# Supplementary material for: Within-host and between-host evolutionary rates across the HIV-1 genome
Source: PubMed Central journal article supplement (PMC3685529; doi:10.1186/1742-4690-10-49), 2013-05-02
Supplement: 1742-4690-10-49-S2.pdf [file 1742-4690-10-49-S2.pdf]

## Supplementary Tables

Table S1: **Model Selection Analysis with an HKY+ $\Gamma$  substitution model.** For the molecular clock model, ‘Relaxed’ indicates an Uncorrelated Lognormal relaxed molecular clock. For the coalescent model, ‘Constant’ stands for constant population size, ‘Expo’ for exponential growth and ‘BSP’ for Bayesian skyline plot. ‘ $\Delta\text{BF}$ ’ is the difference in Bayes Factor with the best model using the method from [1] as implemented in Beast. Classically,  $\Delta\text{BF} > 3$  is positive evidence and a  $\Delta\text{BF} > 10$  is strong evidence for a difference between two models.

| Data set      | Molecular clock model | Coalescent model | Marginal Log Likelihood | Genomic rate of evolution ( $\times 10^{-2}$ ) | Relaxed clock coefficient of variation | $\Delta\text{BF}$ |
|---------------|-----------------------|------------------|-------------------------|------------------------------------------------|----------------------------------------|-------------------|
| POL (PIC1362) | Strict                | Constant         | -6727                   | 0.48 (0.37 – 0.62)                             | NA                                     | 19.1              |
|               | Strict                | Expo             | -6708                   | 0.31 (0.19 – 0.47)                             | NA                                     | 11.1              |
|               | Relaxed               | Constant         | -6699                   | 0.68 (0.47 – 0.96)                             | 0.89 (0.47 – 1.43)                     | 7.8               |
|               | Relaxed               | Expo             | -6685                   | 0.41 (0.29 – 0.51)                             | 0.56 (0.32 – 0.84)                     | 0.64              |
|               | Relaxed               | BSP              | -6682                   | 0.43 (0.35 – 0.53)                             | 0.63 (0.43 – 0.88)                     | 0                 |
| POL (BH)      | Strict                | Constant         | -14429                  | 0.07 (0.04 – 0.09)                             | NA                                     | 24.5              |
|               | Relaxed               | Constant         | -14369                  | 0.09 (0.02 – 0.17)                             | 0.42 (0.23 – 0.73)                     | 0                 |
|               | Relaxed               | Expo             | -14370                  | 0.02 (0.01 – 0.05)                             | 0.31 (0.23 – 0.39)                     | 0.98              |
|               | Relaxed               | BSP              | -14371                  | 0.08 (0.02 – 0.13)                             | 0.30 (0.22 – 0.39)                     | 1.2               |

Table S2: **Fitted values for the WH and BH ER in each genomic region (all the datasets, see also Figure 1).** P-value indicates the outcome of a two-tailed t-test comparing WH and BH rates. Note that some values were missing for the BH dataset.

| Region      | Begins | Ends | Length | Overlap | $\log_{10}(\text{WHER})$ | $\log_{10}(\text{BHER})$ | p-val. |
|-------------|--------|------|--------|---------|--------------------------|--------------------------|--------|
| C2V5        | 7027   | 7646 | 619    | 1       | -1.60                    | -2.46                    | ***    |
| ENV1        | 6311   | 8379 | 2068   | 1       | -1.94                    | -2.52                    | ***    |
| ENV1-1      | 6311   | 7024 | 713    | 1       | -2.04                    | -2.48                    | ***    |
| ENV1-2      | 7024   | 7380 | 356    | 1       | -1.88                    | -2.66                    | ***    |
| ENV1-3      | 7380   | 7968 | 588    | 1       | -1.59                    | -2.51                    | ***    |
| ENV1-4      | 7968   | 8379 | 411    | 1       | -1.97                    | -2.90                    | ***    |
| ENV2        | 8654   | 8795 | 142    | 1       | -1.89                    | -2.58                    | ***    |
| GAG         | 790    | 2087 | 1298   | 1       | -2.76                    | -2.96                    | ***    |
| GAG-POL     | 2088   | 2292 | 205    | 2       | -1.59                    | -2.62                    | ***    |
| NEF         | 8797   | 9085 | 289    | 1       | -1.92                    | -2.73                    | ***    |
| NEF-LTR3    | 9086   | 9417 | 332    | 2       | -2.02                    | -2.66                    | ***    |
| POL         | 2293   | 5040 | 2748   | 1       | -2.55                    | -2.81                    | ***    |
| POL-VIF     | 5051   | 5096 | 56     | 2       | -2.60                    | -3.16                    | ***    |
| REV-ENV     | 8470   | 8653 | 184    | 2       | -1.92                    | missing                  | NA     |
| TAT         | 5851   | 5969 | 119    | 1       | -1.76                    | -2.55                    | ***    |
| TAT-REV     | 5970   | 6045 | 76     | 2       | -1.80                    | -2.48                    | ***    |
| TAT-REV-ENV | 8379   | 8469 | 91     | 3       | missing                  | missing                  | NA     |
| VIF         | 5097   | 5558 | 462    | 1       | -2.35                    | -2.99                    | ***    |
| VIF-VPR     | 5559   | 5619 | 61     | 2       | -3.01                    | missing                  | ***    |
| VPR         | 5620   | 5830 | 211    | 1       | -2.43                    | -3.02                    | ***    |
| VPR-TAT     | 5831   | 5850 | 20     | 2       | -2.40                    | missing                  | NA     |
| VPU         | 6062   | 6224 | 163    | 1       | -2.04                    | missing                  | NA     |
| VPU-ENV     | 6225   | 6310 | 86     | 2       | -2.18                    | -2.53                    | ***    |

Table S3: **Fitted values for the WH and BH ratios in each regions (PIC1362 and US-up4 datasets).** P-value indicates the outcome of a two-tailed t-test comparing WH and BH ratios. Values in *italic* are not significantly different from 1 (one sample t-test).

| Region      | WH ratio    | BH ratio    | P-value |
|-------------|-------------|-------------|---------|
| C2V5        | 0.90        | 0.97        | ***     |
| ENV1        | 0.98        | <i>1.00</i> | ***     |
| ENV1-1      | 0.91        | <i>1.00</i> | ***     |
| ENV1-2      | 0.90        | 0.99        | ***     |
| ENV1-3      | 0.77        | <i>1.00</i> | ***     |
| ENV1-4      | <i>0.96</i> | <i>1.00</i> | n.s.    |
| ENV2        | 0.42        | <i>1.01</i> | ***     |
| GAG         | 1.08        | <i>1.01</i> | ***     |
| GAG-POL     | 0.77        | 0.97        | ***     |
| NEF         | <i>1.00</i> | 0.98        | n.s.    |
| NEF-LTR     | 1.01        | 0.95        | ***     |
| POL         | 0.96        | 0.99        | ***     |
| REV-ENV     | 0.99        | <i>1.00</i> | n.s.    |
| TAT         | 0.92        | 0.95        | ***     |
| TAT-REV     | 1.01        | <i>1.00</i> | ***     |
| TAT-REV-ENV | 0.92        | <i>1.01</i> | ***     |
| VIF         | 0.99        | 1.02        | ***     |
| VIF-VPR     | 0.98        | 0.98        | n.s.    |
| VPR         | 1.00        | 0.98        | ***     |
| VPU         | 0.99        | <i>1.00</i> | **      |
| VPU-ENV     | <i>1.00</i> | <i>1.01</i> | n.s.    |

## References

1. Suchard MA, Weiss RE, Sinsheimer JS: **Bayesian selection of continuous-time Markov chain evolutionary models.** *Mol Biol Evol* 2001, **18**(6):1001–13.
